# Supplementary material for: Unprecedented flexibility of the >TiSi< group for the addition of H2
Source: Royal Society of Chemistry journal article supplement (doi:10.1039/b617521j), 2007-01-01
Supplement: b617521j.pdf [file b617521j.pdf]

# Electronic Supplementary Material (ESM)

for the contribution

## Unprecedented Flexibility of the $>\text{Ti}=\text{Si}<$ Group for the Addition of $\text{H}_2$

by Łukasz Maj and Wojciech Grochala

### Contents

Z-matrixes for all local minima and transition states detected at the B3LYP-6-311++G\*\* level; H atoms No.15 and 16 originate from the  $\text{H}_2$  molecule, which is attached to the  $\text{Ti}_4\text{Si}_4\text{H}_6$  species.

**(0) Ti<sub>4</sub>Si<sub>4</sub>H<sub>6</sub>**

|    |    |     |   |     |   |     |
|----|----|-----|---|-----|---|-----|
| Ti |    |     |   |     |   |     |
| Ti | 1  | B1  |   |     |   |     |
| H  | 1  | B2  | 2 | A1  |   |     |
| H  | 2  | B3  | 1 | A2  | 3 | D1  |
| Ti | 2  | B4  | 1 | A3  | 3 | D2  |
| Ti | 2  | B5  | 1 | A4  | 5 | D3  |
| H  | 6  | B6  | 2 | A5  | 1 | D4  |
| Si | 6  | B7  | 2 | A6  | 1 | D5  |
| H  | 8  | B8  | 6 | A7  | 2 | D6  |
| Si | 5  | B9  | 2 | A8  | 1 | D7  |
| H  | 10 | B10 | 5 | A9  | 2 | D8  |
| Si | 5  | B11 | 2 | A10 | 1 | D9  |
| Si | 5  | B12 | 2 | A11 | 1 | D10 |
| H  | 13 | B13 | 5 | A12 | 2 | D11 |

|     |               |
|-----|---------------|
| B1  | 3.42681446    |
| B2  | 1.72530824    |
| B3  | 1.72530824    |
| B4  | 3.42090701    |
| B5  | 3.43686459    |
| B6  | 1.72233140    |
| B7  | 2.52335133    |
| B8  | 1.49575586    |
| B9  | 2.47848075    |
| B10 | 1.49801840    |
| B11 | 2.35534905    |
| B12 | 2.47848075    |
| B13 | 1.49801840    |
| A1  | 139.68212712  |
| A2  | 139.68212712  |
| A3  | 59.94285929   |
| A4  | 60.09668519   |
| A5  | 145.92667289  |
| A6  | 47.50389380   |
| A7  | 126.79873954  |
| A8  | 93.61798788   |
| A9  | 126.34166104  |
| A10 | 46.17144297   |
| A11 | 47.61943522   |
| A12 | 126.34166104  |
| D1  | 0.00000000    |
| D2  | -133.26893478 |
| D3  | -71.39080479  |
| D4  | -148.24161345 |
| D5  | -58.20292252  |
| D6  | -137.45682167 |
| D7  | -35.38052191  |
| D8  | -171.11841406 |
| D9  | 56.25560971   |
| D10 | -128.53115018 |
| D11 | -146.06930093 |

**(I)**

|    |    |     |   |     |   |     |
|----|----|-----|---|-----|---|-----|
| Ti |    |     |   |     |   |     |
| Ti | 1  | B1  |   |     |   |     |
| H  | 1  | B2  | 2 | A1  |   |     |
| H  | 2  | B3  | 1 | A2  | 3 | D1  |
| Ti | 2  | B4  | 1 | A3  | 3 | D2  |
| Ti | 2  | B5  | 1 | A4  | 5 | D3  |
| H  | 6  | B6  | 2 | A5  | 1 | D4  |
| Si | 6  | B7  | 2 | A6  | 1 | D5  |
| H  | 8  | B8  | 6 | A7  | 2 | D6  |
| Si | 5  | B9  | 2 | A8  | 1 | D7  |
| H  | 10 | B10 | 5 | A9  | 2 | D8  |
| Si | 5  | B11 | 2 | A10 | 1 | D9  |
| Si | 5  | B12 | 2 | A11 | 1 | D10 |
| H  | 13 | B13 | 5 | A12 | 2 | D11 |
| H  | 5  | B14 | 2 | A13 | 1 | D12 |
| H  | 5  | B15 | 2 | A14 | 1 | D13 |

|     |               |
|-----|---------------|
| B1  | 3.47647800    |
| B2  | 1.72557025    |
| B3  | 1.72557025    |
| B4  | 3.37602278    |
| B5  | 3.42669855    |
| B6  | 1.72103680    |
| B7  | 2.52270875    |
| B8  | 1.49548848    |
| B9  | 2.48721049    |
| B10 | 1.49724470    |
| B11 | 2.35913101    |
| B12 | 2.48721049    |
| B13 | 1.49724470    |
| B14 | 2.05313252    |
| B15 | 2.00744871    |
| A1  | 143.12726883  |
| A2  | 143.12726883  |
| A3  | 59.01071624   |
| A4  | 59.51827778   |
| A5  | 145.18886243  |
| A6  | 47.66890493   |
| A7  | 128.52199616  |
| A8  | 95.53787657   |
| A9  | 132.20101133  |
| A10 | 47.24270838   |
| A11 | 48.08673122   |
| A12 | 132.20101133  |
| A13 | 123.63408382  |
| A14 | 105.06011753  |
| D1  | 0.00000000    |
| D2  | -135.21850459 |
| D3  | -71.91149557  |
| D4  | -147.83896735 |
| D5  | -57.57582229  |
| D6  | -136.67214935 |
| D7  | -35.72189768  |
| D8  | -170.64712333 |
| D9  | 56.26611704   |
| D10 | -128.65517471 |
| D11 | -145.51610022 |
| D12 | 113.55048328  |
| D13 | 99.30021574   |

(II)

|    |    |     |   |     |    |     |
|----|----|-----|---|-----|----|-----|
| Ti |    |     |   |     |    |     |
| Ti | 1  | B1  |   |     |    |     |
| H  | 1  | B2  | 2 | A1  |    |     |
| H  | 2  | B3  | 1 | A2  | 3  | D1  |
| Ti | 1  | B4  | 2 | A3  | 4  | D2  |
| Ti | 1  | B5  | 5 | A4  | 2  | D3  |
| H  | 6  | B6  | 1 | A5  | 5  | D4  |
| Si | 6  | B7  | 1 | A6  | 5  | D5  |
| H  | 8  | B8  | 6 | A7  | 1  | D6  |
| Si | 1  | B9  | 8 | A8  | 6  | D7  |
| H  | 10 | B10 | 1 | A9  | 8  | D8  |
| Si | 5  | B11 | 1 | A10 | 10 | D9  |
| Si | 2  | B12 | 1 | A11 | 10 | D10 |
| H  | 13 | B13 | 2 | A12 | 1  | D11 |
| H  | 5  | B14 | 1 | A13 | 6  | D12 |
| H  | 12 | B15 | 5 | A14 | 1  | D13 |

|     |               |
|-----|---------------|
| B1  | 3.65199800    |
| B2  | 1.71979583    |
| B3  | 1.71979583    |
| B4  | 3.40559912    |
| B5  | 3.41675449    |
| B6  | 1.71361980    |
| B7  | 2.52778405    |
| B8  | 1.49503102    |
| B9  | 2.49799435    |
| B10 | 1.49520688    |
| B11 | 2.50491203    |
| B12 | 2.49799435    |
| B13 | 1.49520688    |
| B14 | 1.71526181    |
| B15 | 1.55406048    |
| A1  | 146.57810548  |
| A2  | 146.57810548  |
| A3  | 57.57633009   |
| A4  | 60.73667067   |
| A5  | 143.65217639  |
| A6  | 47.92739879   |
| A7  | 131.27159994  |
| A8  | 95.95617290   |
| A9  | 130.20527538  |
| A10 | 47.18839896   |
| A11 | 90.71839667   |
| A12 | 130.20527538  |
| A13 | 136.53189739  |
| A14 | 51.69882372   |
| D1  | 0.00000000    |
| D2  | 137.76070985  |
| D3  | -68.29548074  |
| D4  | -142.65909239 |
| D5  | 123.30320317  |
| D6  | 133.94867600  |
| D7  | 0.42703592    |
| D8  | 126.52427560  |
| D9  | 178.83008340  |
| D10 | 0.00000000    |
| D11 | -170.51572701 |
| D12 | 159.62921320  |
| D13 | -133.03890830 |

**(III)**

|    |    |     |   |     |   |     |
|----|----|-----|---|-----|---|-----|
| Ti |    |     |   |     |   |     |
| Ti | 1  | B1  |   |     |   |     |
| H  | 1  | B2  | 2 | A1  |   |     |
| H  | 2  | B3  | 1 | A2  | 3 | D1  |
| Ti | 2  | B4  | 1 | A3  | 3 | D2  |
| Ti | 2  | B5  | 1 | A4  | 5 | D3  |
| H  | 6  | B6  | 2 | A5  | 1 | D4  |
| Si | 2  | B7  | 1 | A6  | 6 | D5  |
| H  | 8  | B8  | 2 | A7  | 1 | D6  |
| Si | 6  | B9  | 2 | A8  | 1 | D7  |
| H  | 10 | B10 | 6 | A9  | 2 | D8  |
| Si | 2  | B11 | 1 | A10 | 8 | D9  |
| Si | 6  | B12 | 2 | A11 | 1 | D10 |
| H  | 13 | B13 | 6 | A12 | 2 | D11 |
| H  | 5  | B14 | 2 | A13 | 1 | D12 |
| H  | 12 | B15 | 2 | A14 | 1 | D13 |

|     |               |
|-----|---------------|
| B1  | 3.53564704    |
| B2  | 1.71851656    |
| B3  | 1.71851656    |
| B4  | 3.53564704    |
| B5  | 3.53564704    |
| B6  | 1.71851656    |
| B7  | 2.54348868    |
| B8  | 1.49616454    |
| B9  | 2.54348868    |
| B10 | 1.49616454    |
| B11 | 2.54348868    |
| B12 | 2.54348868    |
| B13 | 1.49616454    |
| B14 | 1.71851656    |
| B15 | 1.49616454    |
| A1  | 144.73561032  |
| A2  | 144.73561032  |
| A3  | 60.00000000   |
| A4  | 60.00000000   |
| A5  | 144.73561032  |
| A6  | 45.96968450   |
| A7  | 126.62456571  |
| A8  | 91.36017602   |
| A9  | 126.62456571  |
| A10 | 45.96968450   |
| A11 | 45.96968450   |
| A12 | 126.62456571  |
| A13 | 144.73561032  |
| A14 | 126.62456571  |
| D1  | 0.00000000    |
| D2  | -144.73561032 |
| D3  | -70.52877937  |
| D4  | -144.73561032 |
| D5  | -56.07333491  |
| D6  | -135.93793119 |
| D7  | 35.26438968   |
| D8  | 180.00000000  |
| D9  | -177.32455081 |
| D10 | 126.60211428  |
| D11 | 135.93793119  |
| D12 | 144.73561032  |
| D13 | 135.93793119  |

(IV)

|    |    |     |   |     |   |     |
|----|----|-----|---|-----|---|-----|
| Ti |    |     |   |     |   |     |
| Ti | 1  | B1  |   |     |   |     |
| H  | 1  | B2  | 2 | A1  |   |     |
| H  | 2  | B3  | 1 | A2  | 3 | D1  |
| Ti | 2  | B4  | 1 | A3  | 3 | D2  |
| Ti | 5  | B5  | 2 | A4  | 1 | D3  |
| H  | 6  | B6  | 5 | A5  | 2 | D4  |
| Si | 2  | B7  | 1 | A6  | 5 | D5  |
| H  | 8  | B8  | 2 | A7  | 1 | D6  |
| Si | 5  | B9  | 2 | A8  | 1 | D7  |
| H  | 10 | B10 | 5 | A9  | 2 | D8  |
| Si | 5  | B11 | 2 | A10 | 1 | D9  |
| Si | 5  | B12 | 2 | A11 | 1 | D10 |
| H  | 13 | B13 | 5 | A12 | 2 | D11 |
| H  | 12 | B14 | 5 | A13 | 2 | D12 |
| H  | 12 | B15 | 5 | A14 | 2 | D13 |

|     |               |
|-----|---------------|
| B1  | 3.40543200    |
| B2  | 1.73551528    |
| B3  | 1.73551528    |
| B4  | 2.99384463    |
| B5  | 3.08849750    |
| B6  | 1.73227328    |
| B7  | 2.49202837    |
| B8  | 1.49335984    |
| B9  | 2.43818923    |
| B10 | 1.49246990    |
| B11 | 2.46823277    |
| B12 | 2.43818923    |
| B13 | 1.49246990    |
| B14 | 1.48602610    |
| B15 | 1.56510796    |
| A1  | 151.29899826  |
| A2  | 151.29899826  |
| A3  | 55.33766555   |
| A4  | 64.07370364   |
| A5  | 151.18061238  |
| A6  | 46.90068107   |
| A7  | 131.54398943  |
| A8  | 107.37733490  |
| A9  | 143.74355346  |
| A10 | 58.08383048   |
| A11 | 53.51318880   |
| A12 | 143.74355346  |
| A13 | 154.46478618  |
| A14 | 52.77512457   |
| D1  | 0.00000000    |
| D2  | -145.01092090 |
| D3  | -70.35766590  |
| D4  | -140.77378501 |
| D5  | -137.17793947 |
| D6  | -146.01389871 |
| D7  | -38.36568145  |
| D8  | -176.25515973 |
| D9  | 64.49009259   |
| D10 | -132.54394484 |
| D11 | -137.50225344 |
| D12 | 137.93040349  |
| D13 | 137.93040349  |

(V)

|    |    |     |   |     |   |     |
|----|----|-----|---|-----|---|-----|
| Ti |    |     |   |     |   |     |
| Ti | 1  | B1  |   |     |   |     |
| H  | 1  | B2  | 2 | A1  |   |     |
| H  | 2  | B3  | 1 | A2  | 3 | D1  |
| Ti | 1  | B4  | 2 | A3  | 4 | D2  |
| Ti | 5  | B5  | 1 | A4  | 2 | D3  |
| H  | 6  | B6  | 5 | A5  | 1 | D4  |
| Si | 2  | B7  | 1 | A6  | 5 | D5  |
| H  | 8  | B8  | 2 | A7  | 1 | D6  |
| Si | 5  | B9  | 1 | A8  | 8 | D7  |
| H  | 10 | B10 | 5 | A9  | 1 | D8  |
| Si | 5  | B11 | 1 | A10 | 8 | D9  |
| Si | 5  | B12 | 1 | A11 | 8 | D10 |
| H  | 13 | B13 | 5 | A12 | 1 | D11 |
| H  | 12 | B14 | 5 | A13 | 1 | D12 |
| H  | 12 | B15 | 5 | A14 | 1 | D13 |

|     |               |
|-----|---------------|
| B1  | 3.19390275    |
| B2  | 1.73557037    |
| B3  | 1.73038880    |
| B4  | 2.87318193    |
| B5  | 2.73478976    |
| B6  | 1.91281698    |
| B7  | 2.46299396    |
| B8  | 1.49450148    |
| B9  | 2.49868486    |
| B10 | 1.48874162    |
| B11 | 2.46062432    |
| B12 | 2.43264198    |
| B13 | 1.49327599    |
| B14 | 1.57503582    |
| B15 | 1.55529568    |
| A1  | 146.83456375  |
| A2  | 153.28958327  |
| A3  | 57.66520666   |
| A4  | 66.55557169   |
| A5  | 90.70264983   |
| A6  | 50.48425616   |
| A7  | 137.77489192  |
| A8  | 59.27213417   |
| A9  | 147.16961484  |
| A10 | 57.81180234   |
| A11 | 110.82599216  |
| A12 | 142.82640998  |
| A13 | 114.98123511  |
| A14 | 121.07201441  |
| D1  | 2.21120053    |
| D2  | 133.23279219  |
| D3  | 73.57942502   |
| D4  | 87.49781645   |
| D5  | -129.89969174 |
| D6  | -144.44099979 |
| D7  | 102.65341727  |
| D8  | 111.87802673  |
| D9  | -99.51984597  |
| D10 | 2.56416924    |
| D11 | -154.99020528 |
| D12 | -12.92501677  |
| D13 | 97.75814600   |

(VI)

|    |    |     |    |     |   |     |
|----|----|-----|----|-----|---|-----|
| Ti |    |     |    |     |   |     |
| Ti | 1  | B1  |    |     |   |     |
| H  | 1  | B2  | 2  | A1  |   |     |
| H  | 2  | B3  | 1  | A2  | 3 | D1  |
| Ti | 2  | B4  | 1  | A3  | 3 | D2  |
| Ti | 5  | B5  | 2  | A4  | 1 | D3  |
| H  | 6  | B6  | 5  | A5  | 2 | D4  |
| Si | 2  | B7  | 1  | A6  | 5 | D5  |
| H  | 8  | B8  | 2  | A7  | 1 | D6  |
| Si | 6  | B9  | 5  | A8  | 2 | D7  |
| H  | 10 | B10 | 6  | A9  | 5 | D8  |
| Si | 1  | B11 | 10 | A10 | 6 | D9  |
| Si | 5  | B12 | 2  | A11 | 1 | D10 |
| H  | 13 | B13 | 5  | A12 | 2 | D11 |
| H  | 5  | B14 | 2  | A13 | 1 | D12 |
| H  | 5  | B15 | 2  | A14 | 1 | D13 |

|     |               |
|-----|---------------|
| B1  | 3.05155518    |
| B2  | 1.72142085    |
| B3  | 1.72138688    |
| B4  | 3.20281359    |
| B5  | 2.88765308    |
| B6  | 1.72992117    |
| B7  | 2.52048475    |
| B8  | 1.49534744    |
| B9  | 2.38015190    |
| B10 | 1.49547297    |
| B11 | 2.41289929    |
| B12 | 2.36904629    |
| B13 | 1.49359396    |
| B14 | 1.91429803    |
| B15 | 1.89362800    |
| A1  | 132.92479969  |
| A2  | 133.84305827  |
| A3  | 63.46194578   |
| A4  | 72.21004012   |
| A5  | 132.93308502  |
| A6  | 55.08703441   |
| A7  | 132.11407197  |
| A8  | 59.44737375   |
| A9  | 151.80188492  |
| A10 | 95.92308921   |
| A11 | 52.99677457   |
| A12 | 154.05445333  |
| A13 | 116.80750004  |
| A14 | 101.34037735  |
| D1  | -3.21204870   |
| D2  | -138.96111229 |
| D3  | -72.41366999  |
| D4  | -133.67366922 |
| D5  | -109.82230969 |
| D6  | -121.66225090 |
| D7  | 117.88670305  |
| D8  | 123.58272843  |
| D9  | 88.80932624   |
| D10 | -137.97340112 |
| D11 | -159.71670616 |
| D12 | 152.87028314  |
| D13 | 174.29663241  |



(VII)

|    |    |     |   |     |    |     |
|----|----|-----|---|-----|----|-----|
| Ti |    |     |   |     |    |     |
| Ti | 1  | B1  |   |     |    |     |
| H  | 1  | B2  | 2 | A1  |    |     |
| H  | 2  | B3  | 1 | A2  | 3  | D1  |
| Ti | 1  | B4  | 2 | A3  | 4  | D2  |
| Ti | 1  | B5  | 2 | A4  | 5  | D3  |
| H  | 6  | B6  | 1 | A5  | 2  | D4  |
| Si | 6  | B7  | 1 | A6  | 2  | D5  |
| H  | 8  | B8  | 6 | A7  | 1  | D6  |
| Si | 6  | B9  | 1 | A8  | 8  | D7  |
| H  | 10 | B10 | 6 | A9  | 1  | D8  |
| Si | 5  | B11 | 1 | A10 | 10 | D9  |
| Si | 2  | B12 | 1 | A11 | 12 | D10 |
| H  | 13 | B13 | 2 | A12 | 1  | D11 |
| H  | 5  | B14 | 1 | A13 | 12 | D12 |
| H  | 13 | B15 | 2 | A14 | 1  | D13 |

|     |               |
|-----|---------------|
| B1  | 3.20478251    |
| B2  | 1.71587194    |
| B3  | 1.71700603    |
| B4  | 3.36533428    |
| B5  | 3.37500483    |
| B6  | 1.71771706    |
| B7  | 2.50233026    |
| B8  | 1.49426944    |
| B9  | 2.49289990    |
| B10 | 1.49394074    |
| B11 | 2.38736349    |
| B12 | 2.60828616    |
| B13 | 1.49171457    |
| B14 | 1.71079848    |
| B15 | 1.56724786    |
| A1  | 134.20820317  |
| A2  | 134.62283656  |
| A3  | 62.43125348   |
| A4  | 66.22621705   |
| A5  | 146.41720643  |
| A6  | 49.40844601   |
| A7  | 128.67183618  |
| A8  | 49.04906734   |
| A9  | 128.87038815  |
| A10 | 46.67460941   |
| A11 | 95.74805850   |
| A12 | 128.00866262  |
| A13 | 120.69990708  |
| A14 | 114.35333696  |
| D1  | -4.04738646   |
| D2  | 127.64177662  |
| D3  | 69.61462987   |
| D4  | 146.21316547  |
| D5  | 57.68095499   |
| D6  | 132.55925074  |
| D7  | 175.33324461  |
| D8  | -136.06905638 |
| D9  | 170.46462740  |
| D10 | -91.84668185  |
| D11 | -163.64681097 |
| D12 | -76.04323110  |
| D13 | 74.01829396   |

(VIII)

|    |    |     |   |     |    |     |
|----|----|-----|---|-----|----|-----|
| Ti |    |     |   |     |    |     |
| Ti | 1  | B1  |   |     |    |     |
| H  | 1  | B2  | 2 | A1  |    |     |
| H  | 2  | B3  | 1 | A2  | 3  | D1  |
| Ti | 1  | B4  | 2 | A3  | 4  | D2  |
| Ti | 5  | B5  | 1 | A4  | 2  | D3  |
| H  | 6  | B6  | 5 | A5  | 1  | D4  |
| Si | 1  | B7  | 6 | A6  | 5  | D5  |
| H  | 8  | B8  | 1 | A7  | 6  | D6  |
| Si | 6  | B9  | 5 | A8  | 1  | D7  |
| H  | 10 | B10 | 6 | A9  | 5  | D8  |
| Si | 5  | B11 | 1 | A10 | 8  | D9  |
| Si | 5  | B12 | 1 | A11 | 12 | D10 |
| H  | 13 | B13 | 5 | A12 | 1  | D11 |
| H  | 10 | B14 | 6 | A13 | 5  | D12 |
| H  | 13 | B15 | 5 | A14 | 1  | D13 |

|     |               |
|-----|---------------|
| B1  | 3.15769420    |
| B2  | 1.71995705    |
| B3  | 1.72380274    |
| B4  | 3.21466123    |
| B5  | 2.68745481    |
| B6  | 1.73437038    |
| B7  | 2.51739835    |
| B8  | 1.49375877    |
| B9  | 2.42893130    |
| B10 | 1.49175047    |
| B11 | 2.40210004    |
| B12 | 2.52683040    |
| B13 | 1.48827376    |
| B14 | 1.60019799    |
| B15 | 1.58604574    |
| A1  | 128.33505916  |
| A2  | 133.27309636  |
| A3  | 64.10732734   |
| A4  | 63.23650059   |
| A5  | 115.54769487  |
| A6  | 53.61095945   |
| A7  | 132.66168789  |
| A8  | 59.05233169   |
| A9  | 149.62933079  |
| A10 | 48.58562340   |
| A11 | 97.11604584   |
| A12 | 139.98865006  |
| A13 | 110.30917944  |
| A14 | 50.30260896   |
| D1  | 6.67434335    |
| D2  | 140.04169327  |
| D3  | 82.44286869   |
| D4  | 168.48984813  |
| D5  | -130.92988903 |
| D6  | -138.04534597 |
| D7  | 65.97073993   |
| D8  | 160.21908888  |
| D9  | -102.18802875 |
| D10 | 86.92140167   |
| D11 | 147.21394590  |
| D12 | 15.38655766   |
| D13 | -162.63259637 |

(IX)

|    |    |     |   |     |   |     |
|----|----|-----|---|-----|---|-----|
| Ti |    |     |   |     |   |     |
| Ti | 1  | B1  |   |     |   |     |
| H  | 1  | B2  | 2 | A1  |   |     |
| H  | 2  | B3  | 1 | A2  | 3 | D1  |
| Ti | 2  | B4  | 1 | A3  | 3 | D2  |
| Ti | 2  | B5  | 1 | A4  | 5 | D3  |
| H  | 6  | B6  | 2 | A5  | 1 | D4  |
| Si | 2  | B7  | 1 | A6  | 5 | D5  |
| H  | 8  | B8  | 2 | A7  | 1 | D6  |
| Si | 6  | B9  | 2 | A8  | 1 | D7  |
| H  | 10 | B10 | 6 | A9  | 2 | D8  |
| Si | 2  | B11 | 1 | A10 | 8 | D9  |
| Si | 2  | B12 | 1 | A11 | 8 | D10 |
| H  | 13 | B13 | 2 | A12 | 1 | D11 |
| H  | 12 | B14 | 2 | A13 | 1 | D12 |
| H  | 5  | B15 | 2 | A14 | 1 | D13 |

|     |               |
|-----|---------------|
| B1  | 3.28066759    |
| B2  | 1.71936430    |
| B3  | 1.71413955    |
| B4  | 3.23109213    |
| B5  | 3.47607964    |
| B6  | 1.72004587    |
| B7  | 2.50929542    |
| B8  | 1.49457559    |
| B9  | 2.50235715    |
| B10 | 1.49422524    |
| B11 | 2.52226294    |
| B12 | 2.49409067    |
| B13 | 1.49409118    |
| B14 | 1.58781741    |
| B15 | 1.71744019    |
| A1  | 141.50099009  |
| A2  | 136.28320064  |
| A3  | 61.18135328   |
| A4  | 62.19640652   |
| A5  | 145.79061348  |
| A6  | 49.50393529   |
| A7  | 131.48644810  |
| A8  | 89.81214515   |
| A9  | 133.22314879  |
| A10 | 49.62366016   |
| A11 | 96.18012121   |
| A12 | 135.27532344  |
| A13 | 115.46919125  |
| A14 | 139.36275165  |
| D1  | -2.70737603   |
| D2  | -133.14229850 |
| D3  | -72.03088427  |
| D4  | -144.02466451 |
| D5  | -127.89754283 |
| D6  | -136.39364742 |
| D7  | 35.41762841   |
| D8  | -179.41742266 |
| D9  | -171.15813236 |
| D10 | 89.65314005   |
| D11 | 175.29751905  |
| D12 | -42.30279513  |
| D13 | 135.21686965  |

(X)

|    |    |     |   |     |   |     |
|----|----|-----|---|-----|---|-----|
| Ti |    |     |   |     |   |     |
| Ti | 1  | B1  |   |     |   |     |
| H  | 1  | B2  | 2 | A1  |   |     |
| H  | 2  | B3  | 1 | A2  | 3 | D1  |
| Ti | 1  | B4  | 2 | A3  | 4 | D2  |
| Ti | 5  | B5  | 1 | A4  | 2 | D3  |
| H  | 6  | B6  | 5 | A5  | 1 | D4  |
| Si | 6  | B7  | 5 | A6  | 1 | D5  |
| H  | 8  | B8  | 6 | A7  | 5 | D6  |
| Si | 5  | B9  | 1 | A8  | 8 | D7  |
| H  | 10 | B10 | 5 | A9  | 1 | D8  |
| Si | 2  | B11 | 1 | A10 | 8 | D9  |
| Si | 6  | B12 | 5 | A11 | 1 | D10 |
| H  | 13 | B13 | 6 | A12 | 5 | D11 |
| H  | 12 | B14 | 2 | A13 | 1 | D12 |
| H  | 12 | B15 | 2 | A14 | 1 | D13 |

|     |               |
|-----|---------------|
| B1  | 2.90179185    |
| B2  | 1.73127738    |
| B3  | 1.72561583    |
| B4  | 3.04538261    |
| B5  | 3.37826457    |
| B6  | 1.72888939    |
| B7  | 2.51916467    |
| B8  | 1.49451630    |
| B9  | 2.46623490    |
| B10 | 1.60160065    |
| B11 | 2.42165543    |
| B12 | 2.44475837    |
| B13 | 1.49783438    |
| B14 | 1.59930106    |
| B15 | 1.72985200    |
| A1  | 128.59133304  |
| A2  | 135.88721633  |
| A3  | 65.29912325   |
| A4  | 69.23875104   |
| A5  | 147.87516325  |
| A6  | 88.98158003   |
| A7  | 122.65623928  |
| A8  | 54.43147229   |
| A9  | 50.43838549   |
| A10 | 58.47920114   |
| A11 | 47.12723463   |
| A12 | 144.31948929  |
| A13 | 121.47880271  |
| A14 | 104.78379146  |
| D1  | -6.74139909   |
| D2  | 127.85067268  |
| D3  | 70.83859262   |
| D4  | 138.69566198  |
| D5  | -23.83196908  |
| D6  | 168.09394783  |
| D7  | 76.12366989   |
| D8  | 142.73368888  |
| D9  | 177.34723775  |
| D10 | -125.56871626 |
| D11 | -154.93781254 |
| D12 | -109.23379323 |
| D13 | -28.24089939  |

(XI)

|    |    |     |   |     |    |     |
|----|----|-----|---|-----|----|-----|
| Ti |    |     |   |     |    |     |
| Ti | 1  | B1  |   |     |    |     |
| H  | 1  | B2  | 2 | A1  |    |     |
| H  | 2  | B3  | 1 | A2  | 3  | D1  |
| Ti | 1  | B4  | 2 | A3  | 4  | D2  |
| Ti | 2  | B5  | 1 | A4  | 5  | D3  |
| H  | 6  | B6  | 2 | A5  | 1  | D4  |
| Si | 6  | B7  | 2 | A6  | 1  | D5  |
| H  | 8  | B8  | 6 | A7  | 2  | D6  |
| Si | 5  | B9  | 1 | A8  | 8  | D7  |
| H  | 10 | B10 | 5 | A9  | 1  | D8  |
| Si | 1  | B11 | 8 | A10 | 6  | D9  |
| Si | 2  | B12 | 1 | A11 | 12 | D10 |
| H  | 13 | B13 | 2 | A12 | 1  | D11 |
| H  | 5  | B14 | 1 | A13 | 12 | D12 |
| H  | 12 | B15 | 1 | A14 | 8  | D13 |

|     |               |
|-----|---------------|
| B1  | 3.13091860    |
| B2  | 1.73120967    |
| B3  | 1.71697021    |
| B4  | 2.85228426    |
| B5  | 3.12692068    |
| B6  | 1.72950116    |
| B7  | 2.43988766    |
| B8  | 1.49504894    |
| B9  | 2.42380994    |
| B10 | 1.49968737    |
| B11 | 2.47081861    |
| B12 | 2.44984214    |
| B13 | 1.49478638    |
| B14 | 1.77589329    |
| B15 | 1.54812249    |
| A1  | 147.98632168  |
| A2  | 133.33513948  |
| A3  | 64.53192418   |
| A4  | 67.98249938   |
| A5  | 141.74273097  |
| A6  | 54.16848669   |
| A7  | 142.03632131  |
| A8  | 65.24006185   |
| A9  | 132.96166024  |
| A10 | 103.76552751  |
| A11 | 96.07786202   |
| A12 | 148.93008002  |
| A13 | 37.91620700   |
| A14 | 122.75512965  |
| D1  | 6.88741092    |
| D2  | 146.23534621  |
| D3  | -75.52974032  |
| D4  | -165.95548433 |
| D5  | -56.78454002  |
| D6  | -114.98536374 |
| D7  | 73.53986340   |
| D8  | 83.79826482   |
| D9  | -91.01094501  |
| D10 | -96.08641110  |
| D11 | -178.95689255 |
| D12 | -102.27491023 |
| D13 | -6.22553892   |

## TS I/II

|    |    |     |   |     |   |     |
|----|----|-----|---|-----|---|-----|
| Ti |    |     |   |     |   |     |
| Ti | 1  | B1  |   |     |   |     |
| H  | 1  | B2  | 2 | A1  |   |     |
| H  | 2  | B3  | 1 | A2  | 3 | D1  |
| Ti | 2  | B4  | 1 | A3  | 3 | D2  |
| Ti | 5  | B5  | 2 | A4  | 1 | D3  |
| H  | 6  | B6  | 5 | A5  | 2 | D4  |
| Si | 1  | B7  | 5 | A6  | 2 | D5  |
| H  | 8  | B8  | 1 | A7  | 5 | D6  |
| Si | 5  | B9  | 2 | A8  | 1 | D7  |
| H  | 10 | B10 | 5 | A9  | 2 | D8  |
| Si | 5  | B11 | 2 | A10 | 1 | D9  |
| Si | 5  | B12 | 2 | A11 | 1 | D10 |
| H  | 13 | B13 | 5 | A12 | 2 | D11 |
| H  | 5  | B14 | 2 | A13 | 1 | D12 |
| H  | 5  | B15 | 2 | A14 | 1 | D13 |

|     |               |
|-----|---------------|
| B1  | 3.54693800    |
| B2  | 1.72289897    |
| B3  | 1.72289897    |
| B4  | 3.32740957    |
| B5  | 3.41027003    |
| B6  | 1.71709540    |
| B7  | 2.53420634    |
| B8  | 1.49519861    |
| B9  | 2.50714836    |
| B10 | 1.49591754    |
| B11 | 2.38772976    |
| B12 | 2.50714836    |
| B13 | 1.49591754    |
| B14 | 1.80419092    |
| B15 | 1.83026555    |
| A1  | 145.59845790  |
| A2  | 145.59845790  |
| A3  | 57.79244247   |
| A4  | 60.99510908   |
| A5  | 147.10274625  |
| A6  | 92.01504543   |
| A7  | 128.13216681  |
| A8  | 97.48090977   |
| A9  | 135.37308264  |
| A10 | 48.73130138   |
| A11 | 48.53320598   |
| A12 | 135.37308264  |
| A13 | 117.32717219  |
| A14 | 89.51013906   |
| D1  | 0.00000000    |
| D2  | -135.34640557 |
| D3  | -69.55919616  |
| D4  | -142.45222732 |
| D5  | -31.81487292  |
| D6  | 178.91054307  |
| D7  | -36.54886334  |
| D8  | -173.35926530 |
| D9  | 56.44158312   |
| D10 | -128.00600391 |
| D11 | -140.85094089 |
| D12 | 108.99606698  |
| D13 | 89.69141885   |

## TS II / III

|    |    |     |    |     |     |
|----|----|-----|----|-----|-----|
| Ti |    |     |    |     |     |
| Ti | 1  | B1  |    |     |     |
| H  | 1  | B2  | 2  | A1  |     |
| H  | 2  | B3  | 1  | A2  | 3   |
| Ti | 2  | B4  | 1  | A3  | 3   |
| Ti | 2  | B5  | 1  | A4  | 5   |
| H  | 6  | B6  | 2  | A5  | 1   |
| Si | 6  | B7  | 2  | A6  | 1   |
| H  | 8  | B8  | 6  | A7  | 2   |
| Si | 5  | B9  | 2  | A8  | 1   |
| H  | 10 | B10 | 5  | A9  | 2   |
| Si | 1  | B11 | 10 | A10 | 5   |
| Si | 5  | B12 | 2  | A11 | 1   |
| H  | 13 | B13 | 5  | A12 | 2   |
| H  | 5  | B14 | 2  | A13 | 1   |
| H  | 12 | B15 | 1  | A14 | 10  |
|    |    |     |    |     | D1  |
|    |    |     |    |     | D2  |
|    |    |     |    |     | D3  |
|    |    |     |    |     | D4  |
|    |    |     |    |     | D5  |
|    |    |     |    |     | D6  |
|    |    |     |    |     | D7  |
|    |    |     |    |     | D8  |
|    |    |     |    |     | D9  |
|    |    |     |    |     | D10 |
|    |    |     |    |     | D11 |
|    |    |     |    |     | D12 |
|    |    |     |    |     | D13 |

|     |               |
|-----|---------------|
| B1  | 3.56895200    |
| B2  | 1.71843846    |
| B3  | 1.71843846    |
| B4  | 3.45801031    |
| B5  | 3.48583699    |
| B6  | 1.71642744    |
| B7  | 2.49593354    |
| B8  | 1.49578018    |
| B9  | 2.50572316    |
| B10 | 1.49547126    |
| B11 | 2.49765045    |
| B12 | 2.50572316    |
| B13 | 1.49547126    |
| B14 | 1.71864935    |
| B15 | 1.50439497    |
| A1  | 146.28456186  |
| A2  | 146.28456186  |
| A3  | 58.93292028   |
| A4  | 59.20807411   |
| A5  | 145.95533127  |
| A6  | 47.30613237   |
| A7  | 136.50253343  |
| A8  | 94.24068974   |
| A9  | 132.87714571  |
| A10 | 94.88129056   |
| A11 | 46.81269077   |
| A12 | 132.87714571  |
| A13 | 139.32357618  |
| A14 | 134.03849539  |
| D1  | 0.00000000    |
| D2  | -147.06608256 |
| D3  | -71.68023231  |
| D4  | -151.88657935 |
| D5  | -56.64745734  |
| D6  | -135.85277844 |
| D7  | -35.36497397  |
| D8  | -172.47950126 |
| D9  | 1.62233123    |
| D10 | -127.66129260 |
| D11 | -142.95186797 |
| D12 | 134.50745207  |
| D13 | 84.05918050   |

## TS III/IV

|    |    |     |    |     |   |     |
|----|----|-----|----|-----|---|-----|
| Ti |    |     |    |     |   |     |
| Ti | 1  | B1  |    |     |   |     |
| H  | 1  | B2  | 2  | A1  |   |     |
| H  | 2  | B3  | 1  | A2  | 3 | D1  |
| Si | 2  | B4  | 1  | A3  | 3 | D2  |
| H  | 5  | B5  | 2  | A4  | 1 | D3  |
| Ti | 5  | B6  | 2  | A5  | 1 | D4  |
| H  | 7  | B7  | 5  | A6  | 2 | D5  |
| Si | 1  | B8  | 5  | A7  | 2 | D6  |
| H  | 9  | B9  | 1  | A8  | 5 | D7  |
| Si | 2  | B10 | 1  | A9  | 9 | D8  |
| H  | 11 | B11 | 2  | A10 | 1 | D9  |
| Ti | 9  | B12 | 1  | A11 | 5 | D10 |
| Si | 13 | B13 | 9  | A12 | 1 | D11 |
| H  | 13 | B14 | 9  | A13 | 1 | D12 |
| H  | 14 | B15 | 13 | A14 | 9 | D13 |

|     |               |
|-----|---------------|
| B1  | 3.53239200    |
| B2  | 1.72361414    |
| B3  | 1.72361414    |
| B4  | 2.48499304    |
| B5  | 1.49778629    |
| B6  | 2.65002119    |
| B7  | 1.72074485    |
| B8  | 2.44806866    |
| B9  | 1.49434546    |
| B10 | 2.44806866    |
| B11 | 1.49434546    |
| B12 | 2.64332677    |
| B13 | 2.28401407    |
| B14 | 1.71806269    |
| B15 | 1.49146810    |
| A1  | 142.21739404  |
| A2  | 142.21739404  |
| A3  | 44.70444947   |
| A4  | 133.77887751  |
| A5  | 83.22643151   |
| A6  | 121.65860235  |
| A7  | 97.50312677   |
| A8  | 137.18585176  |
| A9  | 94.01115286   |
| A10 | 137.18585176  |
| A11 | 73.31291198   |
| A12 | 108.55741011  |
| A13 | 131.64581130  |
| A14 | 165.30916707  |
| D1  | 0.00000000    |
| D2  | 88.84428955   |
| D3  | -165.51094765 |
| D4  | 83.10751332   |
| D5  | 134.29606483  |
| D6  | 88.12175677   |
| D7  | 150.35903759  |
| D8  | 0.00000000    |
| D9  | 164.82770327  |
| D10 | -86.56497768  |
| D11 | -8.75226082   |
| D12 | -94.18494182  |
| D13 | -129.36192719 |



## TS 0 / IV

|    |    |     |   |     |   |
|----|----|-----|---|-----|---|
| Ti |    |     |   |     |   |
| Ti | 1  | B1  |   |     |   |
| H  | 1  | B2  | 2 | A1  |   |
| H  | 2  | B3  | 1 | A2  | 3 |
| Ti | 2  | B4  | 1 | A3  | 3 |
| Ti | 5  | B5  | 2 | A4  | 1 |
| H  | 6  | B6  | 5 | A5  | 2 |
| Si | 2  | B7  | 1 | A6  | 5 |
| H  | 8  | B8  | 2 | A7  | 1 |
| Si | 5  | B9  | 2 | A8  | 1 |
| H  | 10 | B10 | 5 | A9  | 2 |
| Si | 5  | B11 | 2 | A10 | 1 |
| Si | 5  | B12 | 2 | A11 | 1 |
| H  | 13 | B13 | 5 | A12 | 2 |
| H  | 12 | B14 | 5 | A13 | 2 |
| H  | 12 | B15 | 5 | A14 | 2 |

|     |               |
|-----|---------------|
| B1  | 3.50856600    |
| B2  | 1.73307918    |
| B3  | 1.73307918    |
| B4  | 3.18362009    |
| B5  | 3.18245499    |
| B6  | 1.72812896    |
| B7  | 2.50987059    |
| B8  | 1.49467660    |
| B9  | 2.46029785    |
| B10 | 1.49489022    |
| B11 | 2.46790718    |
| B12 | 2.46029785    |
| B13 | 1.49489022    |
| B14 | 1.62998148    |
| B15 | 1.62497249    |
| A1  | 155.87273701  |
| A2  | 155.87273701  |
| A3  | 56.56201948   |
| A4  | 62.12129881   |
| A5  | 148.96245026  |
| A6  | 45.65689139   |
| A7  | 130.29935628  |
| A8  | 102.64370963  |
| A9  | 137.24101783  |
| A10 | 52.11972472   |
| A11 | 50.42295061   |
| A12 | 137.24101783  |
| A13 | 128.41220352  |
| A14 | 93.39173319   |
| D1  | 0.00000000    |
| D2  | -153.02792676 |
| D3  | -69.55472795  |
| D4  | -141.43630164 |
| D5  | -134.87643112 |
| D6  | -145.97735182 |
| D7  | -36.31363000  |
| D8  | -173.70607018 |
| D9  | 59.09020728   |
| D10 | -131.43573724 |
| D11 | -141.33495537 |
| D12 | 135.72251501  |
| D13 | 135.72251501  |

## TS VI/VII

|    |    |     |   |     |   |     |
|----|----|-----|---|-----|---|-----|
| Ti |    |     |   |     |   |     |
| Ti | 1  | B1  |   |     |   |     |
| H  | 1  | B2  | 2 | A1  |   |     |
| H  | 2  | B3  | 1 | A2  | 3 | D1  |
| Ti | 2  | B4  | 1 | A3  | 3 | D2  |
| Ti | 5  | B5  | 2 | A4  | 1 | D3  |
| H  | 6  | B6  | 5 | A5  | 2 | D4  |
| Si | 6  | B7  | 5 | A6  | 2 | D5  |
| H  | 8  | B8  | 6 | A7  | 5 | D6  |
| Si | 6  | B9  | 5 | A8  | 2 | D7  |
| H  | 10 | B10 | 6 | A9  | 5 | D8  |
| Si | 1  | B11 | 8 | A10 | 6 | D9  |
| Si | 5  | B12 | 2 | A11 | 1 | D10 |
| H  | 13 | B13 | 5 | A12 | 2 | D11 |
| H  | 5  | B14 | 2 | A13 | 1 | D12 |
| H  | 5  | B15 | 2 | A14 | 1 | D13 |

|     |               |
|-----|---------------|
| B1  | 3.09981327    |
| B2  | 1.71908084    |
| B3  | 1.71876485    |
| B4  | 3.23705711    |
| B5  | 2.97341594    |
| B6  | 1.72487687    |
| B7  | 2.51735836    |
| B8  | 1.49455225    |
| B9  | 2.38511747    |
| B10 | 1.49456433    |
| B11 | 2.42307075    |
| B12 | 2.37697314    |
| B13 | 1.49054685    |
| B14 | 1.77740558    |
| B15 | 1.78784368    |
| A1  | 132.86809491  |
| A2  | 132.56296299  |
| A3  | 62.67775734   |
| A4  | 70.65504449   |
| A5  | 137.92802505  |
| A6  | 96.41629552   |
| A7  | 130.38723845  |
| A8  | 58.08872280   |
| A9  | 148.80962004  |
| A10 | 101.15876891  |
| A11 | 52.65575427   |
| A12 | 147.10606325  |
| A13 | 115.90060951  |
| A14 | 91.23746817   |
| D1  | -1.74680823   |
| D2  | -137.48069286 |
| D3  | -72.04856694  |
| D4  | -133.79977797 |
| D5  | 23.65245894   |
| D6  | 175.92340107  |
| D7  | 119.99498501  |
| D8  | 128.13552979  |
| D9  | -84.69217225  |
| D10 | -137.97192124 |
| D11 | -161.04988486 |
| D12 | 158.68287903  |
| D13 | -175.37244764 |

## TS VII / VIII

|    |    |     |   |     |    |
|----|----|-----|---|-----|----|
| Ti |    |     |   |     |    |
| Ti | 1  | B1  |   |     |    |
| H  | 1  | B2  | 2 | A1  |    |
| H  | 2  | B3  | 1 | A2  | 3  |
| Ti | 1  | B4  | 2 | A3  | 4  |
| Ti | 5  | B5  | 1 | A4  | 2  |
| H  | 6  | B6  | 5 | A5  | 1  |
| Si | 6  | B7  | 5 | A6  | 1  |
| H  | 8  | B8  | 6 | A7  | 5  |
| Si | 6  | B9  | 5 | A8  | 1  |
| H  | 10 | B10 | 6 | A9  | 5  |
| Si | 5  | B11 | 1 | A10 | 10 |
| Si | 2  | B12 | 1 | A11 | 12 |
| H  | 13 | B13 | 2 | A12 | 1  |
| H  | 5  | B14 | 1 | A13 | 12 |
| H  | 13 | B15 | 2 | A14 | 1  |

|     |               |
|-----|---------------|
| B1  | 3.17125045    |
| B2  | 1.71617078    |
| B3  | 1.71746540    |
| B4  | 3.31178770    |
| B5  | 3.30974437    |
| B6  | 1.72004793    |
| B7  | 2.50809070    |
| B8  | 1.49456694    |
| B9  | 2.43152051    |
| B10 | 1.49098061    |
| B11 | 2.41006879    |
| B12 | 2.58547858    |
| B13 | 1.49181068    |
| B14 | 1.71142844    |
| B15 | 1.57231422    |
| A1  | 132.74391589  |
| A2  | 133.56226504  |
| A3  | 63.00321786   |
| A4  | 61.20879342   |
| A5  | 142.80550185  |
| A6  | 94.43669349   |
| A7  | 128.31826529  |
| A8  | 49.25592707   |
| A9  | 137.98450960  |
| A10 | 47.16339864   |
| A11 | 96.56559226   |
| A12 | 132.61936641  |
| A13 | 106.66365819  |
| A14 | 114.38201716  |
| D1  | -1.62896383   |
| D2  | 131.45085753  |
| D3  | 78.40620180   |
| D4  | 153.64304592  |
| D5  | -37.42836034  |
| D6  | 173.87958103  |
| D7  | 61.00361467   |
| D8  | 135.33896624  |
| D9  | 167.64568511  |
| D10 | -89.85121854  |
| D11 | -153.02886931 |
| D12 | -102.07293173 |
| D13 | 76.51243829   |

## TS VII / IX

|    |    |     |   |     |    |     |
|----|----|-----|---|-----|----|-----|
| Ti |    |     |   |     |    |     |
| Ti | 1  | B1  |   |     |    |     |
| H  | 1  | B2  | 2 | A1  |    |     |
| H  | 2  | B3  | 1 | A2  | 3  | D1  |
| Ti | 1  | B4  | 2 | A3  | 4  | D2  |
| Ti | 5  | B5  | 1 | A4  | 2  | D3  |
| H  | 6  | B6  | 5 | A5  | 1  | D4  |
| Si | 2  | B7  | 1 | A6  | 5  | D5  |
| H  | 8  | B8  | 2 | A7  | 1  | D6  |
| Si | 6  | B9  | 5 | A8  | 1  | D7  |
| H  | 10 | B10 | 6 | A9  | 5  | D8  |
| Si | 5  | B11 | 1 | A10 | 10 | D9  |
| Si | 6  | B12 | 5 | A11 | 1  | D10 |
| H  | 13 | B13 | 6 | A12 | 5  | D11 |
| H  | 5  | B14 | 1 | A13 | 10 | D12 |
| H  | 13 | B15 | 6 | A14 | 5  | D13 |

|     |               |
|-----|---------------|
| B1  | 3.34099941    |
| B2  | 1.71589181    |
| B3  | 1.72280735    |
| B4  | 3.23767256    |
| B5  | 3.41937142    |
| B6  | 1.71731931    |
| B7  | 2.50821307    |
| B8  | 1.49485212    |
| B9  | 2.51106861    |
| B10 | 1.49411361    |
| B11 | 2.45288661    |
| B12 | 2.55801495    |
| B13 | 1.49141790    |
| B14 | 1.72009314    |
| B15 | 1.90115945    |
| A1  | 134.23465929  |
| A2  | 140.03205189  |
| A3  | 63.92805723   |
| A4  | 62.49795479   |
| A5  | 147.95216858  |
| A6  | 48.62038503   |
| A7  | 132.49423366  |
| A8  | 48.20679025   |
| A9  | 128.51506918  |
| A10 | 50.21937442   |
| A11 | 48.93154096   |
| A12 | 140.14944464  |
| A13 | 136.31840157  |
| A14 | 107.64531153  |
| D1  | 2.51264139    |
| D2  | 134.10649984  |
| D3  | 70.03660647   |
| D4  | 142.03621102  |
| D5  | -126.77803620 |
| D6  | -140.62710499 |
| D7  | 59.27828746   |
| D8  | 128.45489556  |
| D9  | 179.65863929  |
| D10 | -126.51837157 |
| D11 | -135.45084091 |
| D12 | 98.00709355   |
| D13 | 41.83949581   |

**TS XI/V**

|    |    |     |   |     |   |
|----|----|-----|---|-----|---|
| Ti |    |     |   |     |   |
| Ti | 1  | B1  |   |     |   |
| H  | 1  | B2  | 2 | A1  |   |
| H  | 2  | B3  | 1 | A2  | 3 |
| Ti | 1  | B4  | 2 | A3  | 4 |
| Ti | 1  | B5  | 2 | A4  | 5 |
| H  | 6  | B6  | 1 | A5  | 2 |
| Si | 6  | B7  | 1 | A6  | 2 |
| H  | 8  | B8  | 6 | A7  | 1 |
| Si | 5  | B9  | 1 | A8  | 8 |
| H  | 10 | B10 | 5 | A9  | 1 |
| Si | 5  | B11 | 1 | A10 | 8 |
| Si | 5  | B12 | 1 | A11 | 8 |
| H  | 13 | B13 | 5 | A12 | 1 |
| H  | 12 | B14 | 5 | A13 | 1 |
| H  | 12 | B15 | 5 | A14 | 1 |

|     |               |
|-----|---------------|
| B1  | 3.18597478    |
| B2  | 1.72214833    |
| B3  | 1.71681484    |
| B4  | 3.43647372    |
| B5  | 3.47056089    |
| B6  | 1.72459230    |
| B7  | 2.51526330    |
| B8  | 1.49507505    |
| B9  | 2.49261816    |
| B10 | 1.49777060    |
| B11 | 2.42663955    |
| B12 | 2.47229243    |
| B13 | 1.49840444    |
| B14 | 1.68781956    |
| B15 | 1.66769494    |
| A1  | 141.21598743  |
| A2  | 139.71210929  |
| A3  | 63.41883318   |
| A4  | 62.86604915   |
| A5  | 149.02901843  |
| A6  | 46.61463067   |
| A7  | 124.21976635  |
| A8  | 49.16534786   |
| A9  | 123.02294064  |
| A10 | 49.29523222   |
| A11 | 89.72546359   |
| A12 | 122.98159962  |
| A13 | 87.91745453   |
| A14 | 101.58598803  |
| D1  | 0.05758773    |
| D2  | 134.33665259  |
| D3  | 70.19767373   |
| D4  | 141.42551665  |
| D5  | 60.67546046   |
| D6  | 140.90056204  |
| D7  | 86.97045606   |
| D8  | 131.73334657  |
| D9  | -101.40775052 |
| D10 | -5.11266788   |
| D11 | 178.10266404  |
| D12 | -41.55404483  |
| D13 | 116.55879915  |
